# Supplementary material
Source: Springer Nature journal article supplement (https://www.springermedizin.de/resource/supplementary/13058_2010_9525_MOESM2_ESM.pdf/9702292)
Supplement: MOESM2 [file 9702292]

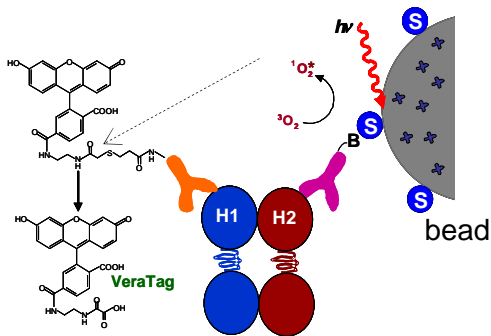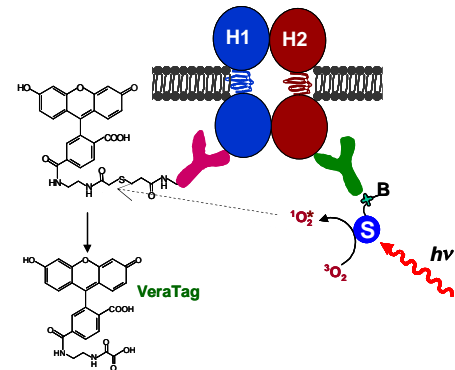

1. Ab-biotin and Ab-VeraTag reporter bind to analytes.
2. Streptavidin-functionalized sensitizer dye binds to Ab-biotin.
3. 670 nm light causes singlet oxygen release.
4. Singlet oxygen induces cleavage and release of VeraTag reporter into solution.
5. Solution is collected and analyzed by capillary electrophoresis.

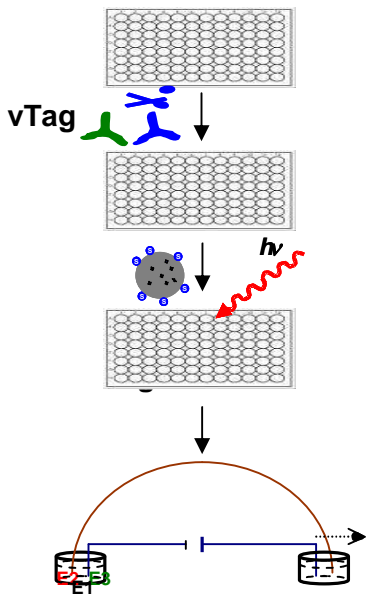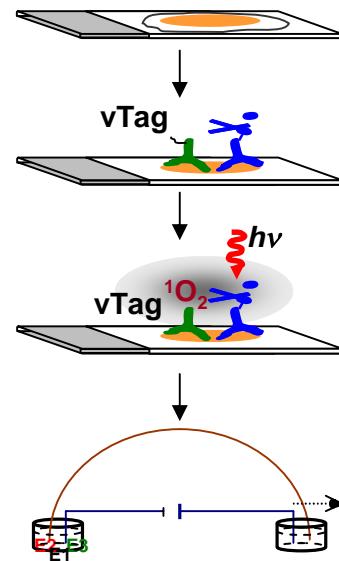

**Capillary electrophoresis**
